# Supplementary material for: C/N-sensitized self-assembly of mesostructured TiO2 nanospheres with significantly enhanced photocatalytic activity
Source: Royal Society of Chemistry journal article supplement (doi:10.1039/c3nj00003f), 2013-01-01
Supplement: c3nj00003f.pdf [file c3nj00003f.pdf]

## Supporting Information

### C/N-sensitized self-assembly of mesostructured TiO<sub>2</sub> nanospheres with significantly enhanced photocatalytic activity

Guobao Zhou,<sup>a</sup> Xiangwen Liu,<sup>b</sup> Caiyun Nan,<sup>b</sup> Yunxin Liu,<sup>b</sup> Dingsheng Wang,<sup>b</sup> and Xiaoqing Chen<sup>\*a</sup>

<sup>a</sup>College of Chemistry and Chemical Engineering, Key Laboratory of Resources Chemistry of Nonferrous Metals, Central South University, Changsha, 410083, China.

<sup>b</sup>College of Chemistry, Department of Materials Science and Engineering, Tsinghua University, Beijing, 100084, China.

E-mail: [xqchen@csu.edu.cn](mailto:xqchen@csu.edu.cn); Tel: +86-731-88830833.

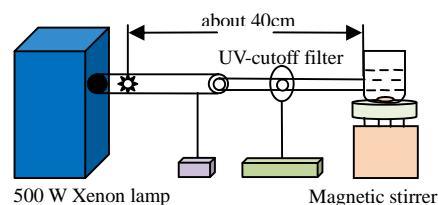

*Figure S1.* The schematic diagram of photodegradation progress, illumination distance and strength, initial amounts of RhB and photocatalysts, stirring speed were all maintained the same.

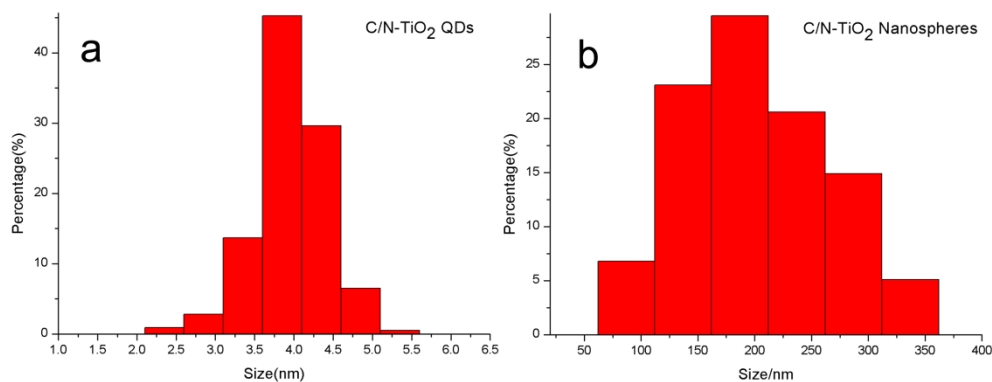

*Figure S2.* Size distribution histogram of (a) C/N-TiO<sub>2</sub> QDs and (b) C/N-TiO<sub>2</sub> nanospheres. ~300 particles are measured to get the size distribution.

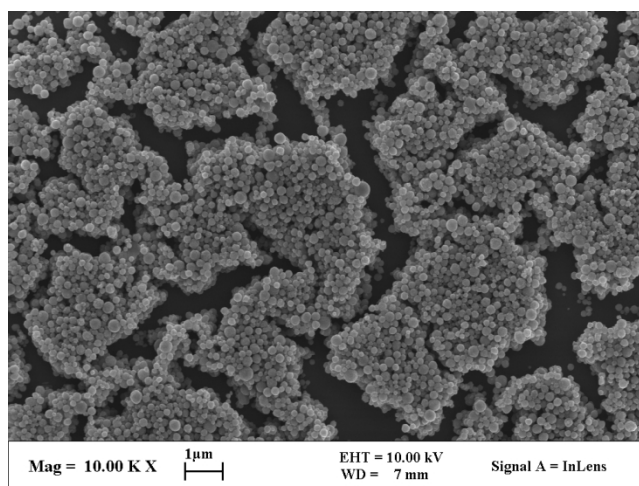

Figure S3. SEM images of microporous C/N-TiO<sub>2</sub> nanospheres after degradation of RhB several cycling uses.

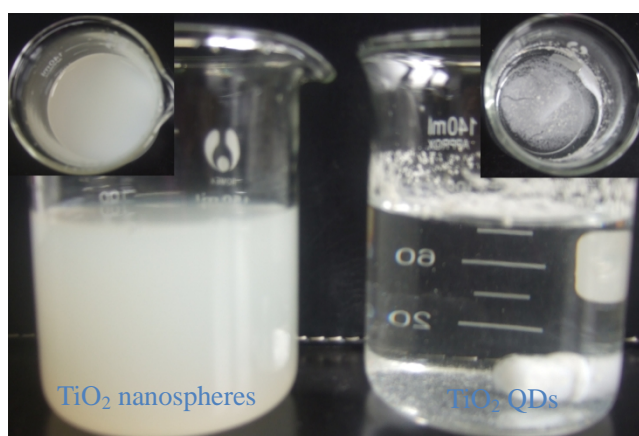

Figure S4. C/N-TiO<sub>2</sub> nanospheres and C/N-TiO<sub>2</sub> QDs dissolved in deionized water.

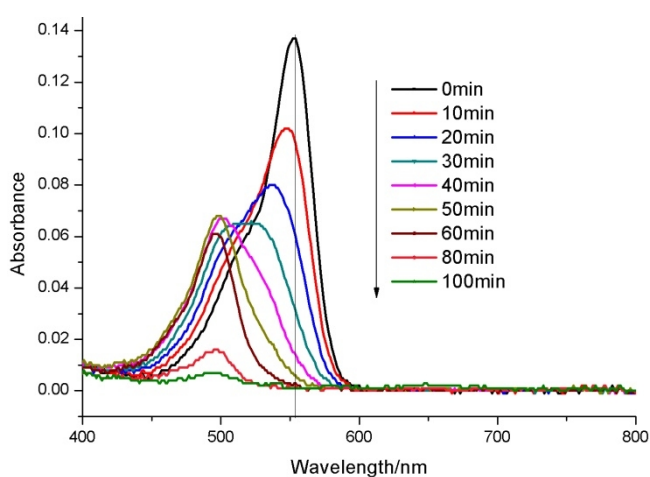

Figure S5. UV-vis spectral changes of RhB as a function of irradiation time and the wavelength position of its major absorption band moved toward the blue region. The wavelength shift is caused by de-ethylation of RhB because of attack by one of the active oxygen species on the N-ethyl group<sup>[1]</sup>.

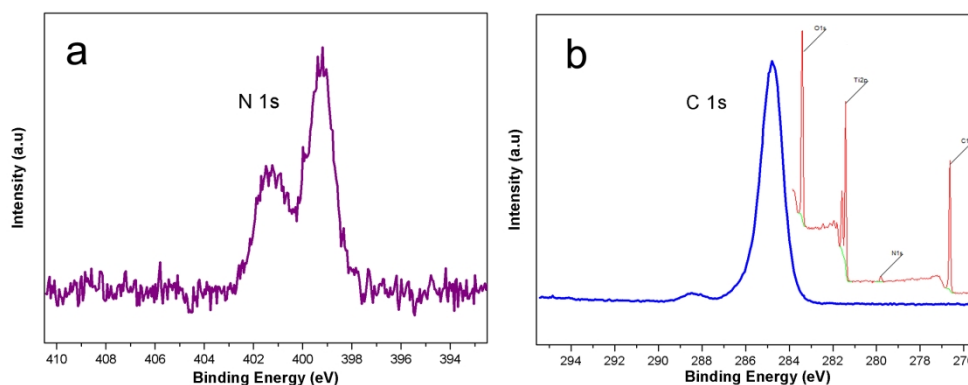

Figure S6. XPS spectra of (a) N 1s and (b) C 1s region for C/N-TiO<sub>2</sub> nanospheres after degradation of RhB several cyclings.

Table S1. Values, Standard Error and R<sup>2</sup> of TiO<sub>2</sub> based catalysts during degrading rhodamine B (according to Figure 7,8,9).

| <i>Samples</i>                                | <i>Mean Value</i> | <i>Standard Error</i> | <i>R<sup>2</sup></i> |
|-----------------------------------------------|-------------------|-----------------------|----------------------|
| <b>P25</b>                                    | 0.00192           | 0.000109              | 0.9838               |
| <b>C/N-TiO<sub>2</sub> QDs-300</b>            | 0.00198           | 0.000154              | 0.9704               |
| <b>C/N-TiO<sub>2</sub> QDs-200</b>            | 0.00108           | 0.000101              | 0.9571               |
| <b>C/N-TiO<sub>2</sub> QDs</b>                | 0.00807           | 0.000254              | 0.9950               |
| <b>C/N-TiO<sub>2</sub> nanospheres-300</b>    | 0.00763           | 0.000476              | 0.9808               |
| <b>C/N-TiO<sub>2</sub> nanospheres-200</b>    | 0.00559           | 0.000260              | 0.9892               |
| <b>C/N-TiO<sub>2</sub> nanospheres</b>        | 0.147             | 0.0159                | 0.9715               |
| <b>C/N-TiO<sub>2</sub> nanospheres (2.5×)</b> | 0.0913            | 0.00626               | 0.9769               |
| <b>First Cycling</b>                          | 0.147             | 0.0102                | 0.9715               |
| <b>Second Cycling</b>                         | 0.139             | 0.00667               | 0.9886               |
| <b>Third Cycling</b>                          | 0.160             | 0.0145                | 0.9621               |
| <b>Fourth Cycling</b>                         | 0.143             | 0.0167                | 0.9354               |

[1] T. X. Wu, G. M. Liu, J. C. Zhao, H. Hidaka and N. Serpone, *J. Phys. Chem. B.*, 1998, **102**, 5845.
